# Supplementary material for: Gene-Based Tests of Association
Source: PubMed Central journal article supplement (PMC3145613; doi:10.1371/journal.pgen.1002177), 2011-07-28
Supplement: pgen.1002177.s004.pdf [file pgen.1002177.s004.pdf]

**Supp. Table 1.** Number of identified genome-wide significant loci.

| Trait | 20 kb |   |    |    |     |   | 100 kb |   |    |   |
|-------|-------|---|----|----|-----|---|--------|---|----|---|
|       | G     | S | SP | B* | V** | L | G      | S | SP | L |
| PR    | 2     | 2 | 2  | 2  | 2   | 1 | 2      | 2 | 2  | 1 |
| QRS   | 1     | 0 | 0  | 0  | 0   | 0 | 1      | 0 | 0  | 1 |
| QT    | 3     | 2 | 2  | 3  | 2   | 1 | 3      | 2 | 2  | 1 |

Results are reported for 20 kb and 100 kb flanking transcription boundaries. G: GWIS, S: minSNP, SP: minSNP-P, B: BIMBAM, V: VEGAS, L: LASSO. \*BIMBAM was only tested for 20 kb. \*\*VEGAS is hard-coded to use  $\pm 50$  kb.
